# Supplementary material
Source: PubMed Central journal article supplement (PMC3092184)
Supplement: supp_1947601910361495_DS_10.1177_1947601910361495_FigsS1-S4.pdf [file supp_1947601910361495_DS_10.1177_1947601910361495_FigsS1-S4.pdf]

## Supplemental Figure Legends

### **Supplemental Figure 1. Wild-type FLI, $\Delta 22$ and FLI ETS domain binding to GGAA**

**repeats.** EMSA was performed using DNA duplexes harboring 7 consecutive GGAA motifs and 3xFlag wild-type FLI nuclear extract (A), recombinant  $\Delta 22$  protein (B), or recombinant FLI ETS domain protein (C). Unlabeled DNA duplexes (I) and (II) were used as positive or negative competitors respectively, while  $\alpha$ -FLAG (F1804; Sigma-Aldrich, St. Louis, MO) and  $\alpha$ -FLI antibodies (sc356x; Santa Cruz Biotechnology, Santa Cruz, CA) were used for supershift. A non-specific band is designated by 'ns.'

### **Supplemental Figure 2. Significant DNA conformational changes are not involved in**

**EWS/FLI microsatellite binding.** Electrophoresis of DNA probes harboring 4 consecutive GGAA motifs located at different linear positions along the DNA strand demonstrate identical mobilities in the unbound state. The addition of recombinant  $\Delta 22$  protein demonstrates nearly identical protein-bound DNA mobilities, indicating the lack of significant DNA bending or other conformational changes. Sequences of the DNA duplexes used are given in Supplemental Table.

### **Supplemental Figure 3. Titration of $\Delta 22$ or FLI ETS domain proteins in EMSA.**

EMSA with probe containing 4 consecutive GGAA motifs and increasing amounts of recombinant  $\Delta 22$  protein (A) or recombinant FLI ETS domain protein (B). Protein concentration varied from 0-1  $\mu$ M from left to right.

### **Supplemental Figure 4. Affinity of $\Delta 22$ for microsatellite sequences is lower than for high**

**affinity ETS binding site.** EMSA was performed using DNA duplexes harboring 4 consecutive

GGAA motifs or DNA duplex(I) harboring a single high affinity ETS binding site. Recombinant  $\Delta 22$  protein was used in the indicated lanes. Unlabeled DNA duplexes harboring either the high affinity site or 4 consecutive GGAA motifs are used as binding competitors in the amounts as indicated (represented as fold molar excesses with respect to the labeled probe).



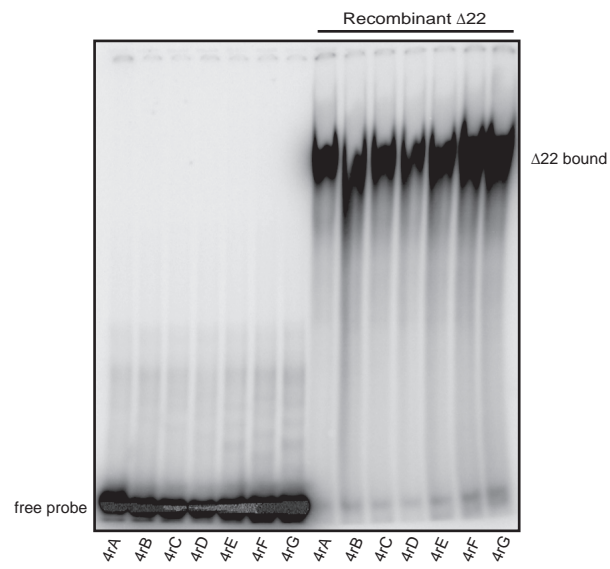

Supplemental Figure 2

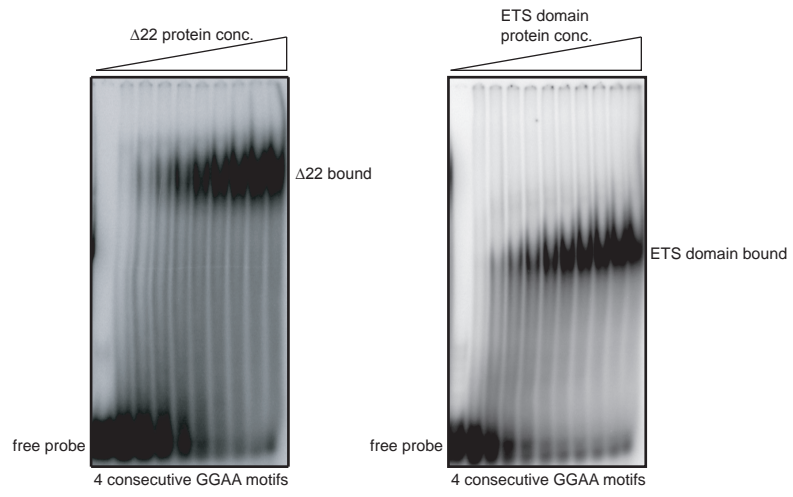

Supplemental Figure 3

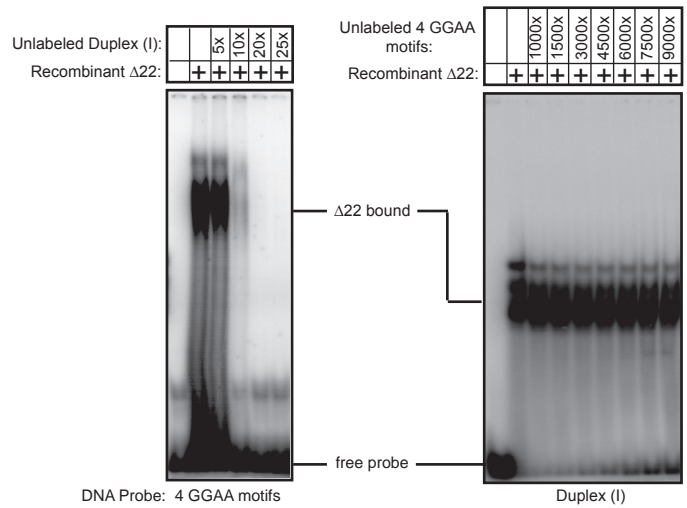

Supplemental Figure 4
