# Supplementary material
Source: PubMed Central journal article supplement (PMC3092184)
Supplement: supp_1947601910361495_DS_10.1177_1947601910361495_TableS1.pdf [file supp_1947601910361495_DS_10.1177_1947601910361495_TableS1.pdf]

**Supplemental Table.** DNA probes used for EMSA in Supplemental Fig. 1. Only the top strand sequence is shown. These were annealed with their complementary bottom strands and used in EMSA.

| <b>Name</b> | <b>Top strand sequence</b>                                     |
|-------------|----------------------------------------------------------------|
| 4rA         | 5' - TTTTGGGAAGGAAGGAAGGAATTTTTTTTTTTTTTTT - 3'                |
| 4rB         | 5' - TTTTTTGGGAAGGAAGGAAGGAATTTTTTTTTTTTTTTT - 3'              |
| 4rC         | 5' - TTTTTTTTTGGGAAGGAAGGAAGGAATTTTTTTTTTTTTTTT - 3'           |
| 4rD         | 5' - TTTTTTTTTTTGGGAAGGAAGGAAGGAATTTTTTTTTTTTTTTT - 3'         |
| 4rE         | 5' - TTTTTTTTTTTTTTGGGAAGGAAGGAAGGAATTTTTTTTTTTTTTTT - 3'      |
| 4rF         | 5' - TTTTTTTTTTTTTTTTTGGGAAGGAAGGAAGGAATTTTTTTTTTTTTTTT - 3'   |
| 4rG         | 5' - TTTTTTTTTTTTTTTTTTTGGGAAGGAAGGAAGGAATTTTTTTTTTTTTTTT - 3' |
